# Supplementary material for: A new type of p-type NiO/n-type ZnO nano-heterojunctions with enhanced photocatalytic activity
Source: Royal Society of Chemistry journal article supplement (doi:10.1039/c4ra04600e), 2014-07-02
Supplement: c4ra04600e1.pdf [file c4ra04600e1.pdf]

† **Electronic Supplementary Information (ESI) available**

**A new type of the p-Type NiO/n-Type ZnO Nanoheterojunctions  
with Enhanced Photocatalytic Activity**

**Mu Xiao, Yangfan Lu<sup>\*</sup>, Yaguang Li, Hui Song, Zhizhen Ye<sup>\*</sup>**

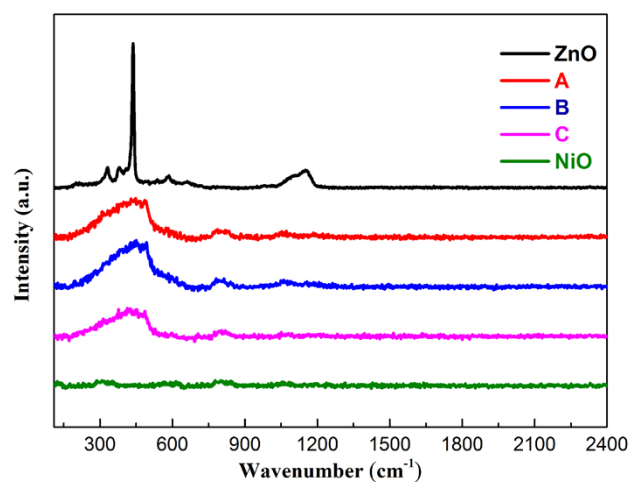

**Figure S1.** Raman spectra for ZnO, NiO, A, B and C samples.

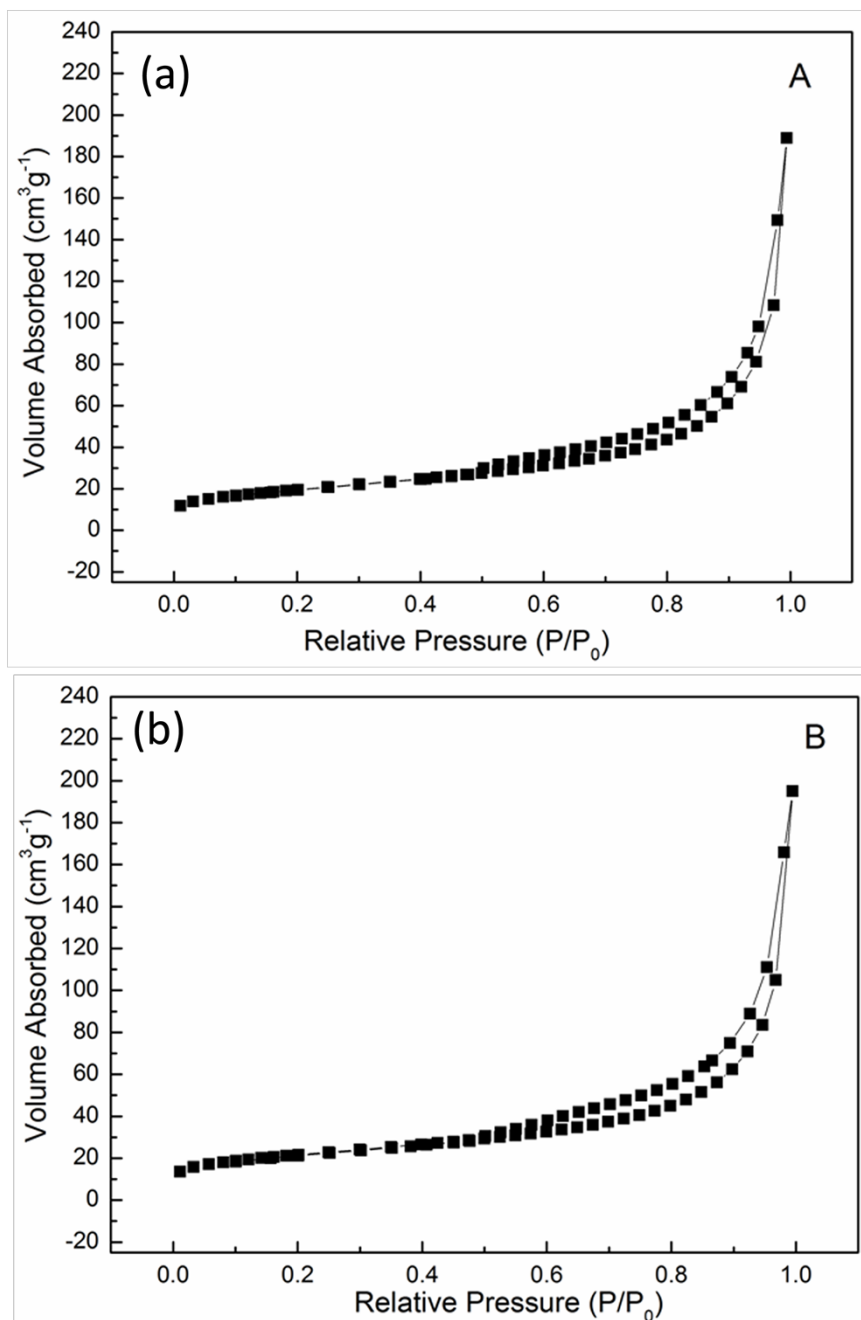

**Figure S2.** N<sub>2</sub> adsorption–desorption isotherm of (a) A and (b) B samples.
